# Supplementary material
Source: Elsevier journal article supplement (https://www.sciencedirect.com/science/article/pii/S1698698917300061)
Supplement: mmc1 [file S1698698917300061:mmc1.doc]

**Appendix B – Supplementary Material**

**Figure B.1 Relationship between fertility and human capital of women**, 1900 and 1960

|  |
| --- |

*Source:* See appendix

*Note:* The regions in red and blue correspond to the regions located on the West and on the East side of the Hajnal line, respectively.
